# Supplementary material
Source: PubMed Central journal article supplement (PMC3063761)
Supplement: pgen.1002027.s001.pdf [file pgen.1002027.s001.pdf]

**Supplemental Figure S1.** Structure of the RNase MRP complex (modified from Welting et al<sup>1</sup>, reproduced with permission of the Oxford University Press). Human POP1 (hPOP1) highlighted in orange. Domains of RMRP RNA that have been implicated in anauxetic dysplasia highlighted in blue.

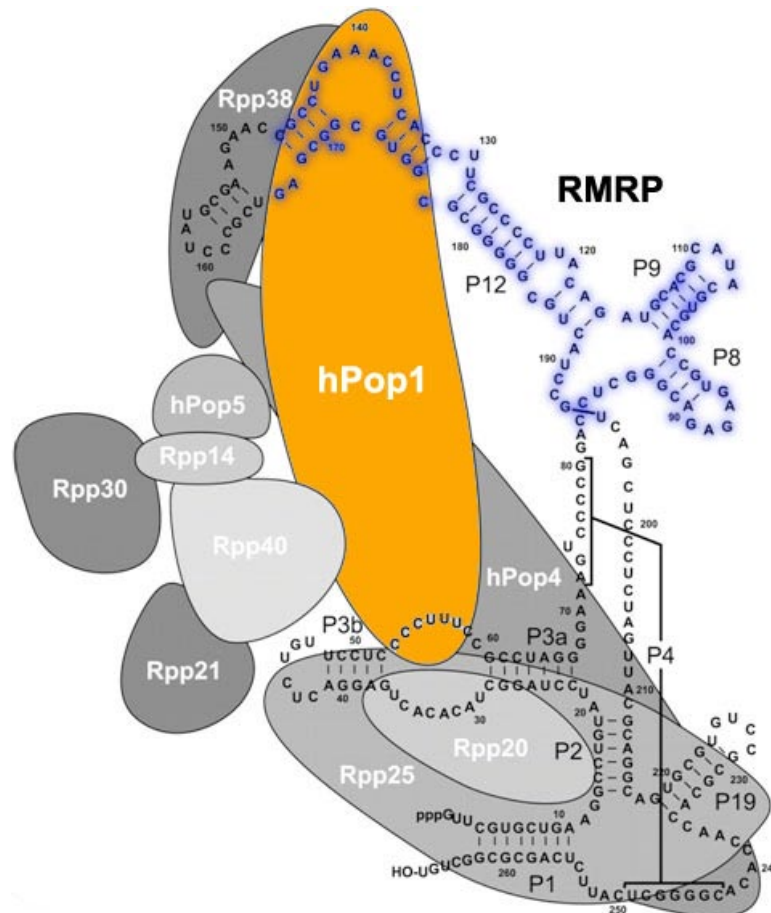

## References

1. Welting, T.J., van Venrooij, W.J. & Pruijn, G.J. Mutual interactions between subunits of the human RNase MRP ribonucleoprotein complex. *Nucleic Acids Res* **32**, 2138-46 (2004).
