# Supplementary material
Source: PubMed Central journal article supplement (PMC3063761)
Supplement: pgen.1002027.s002.pdf [file pgen.1002027.s002.pdf]

**Supplemental Table S1.** Candidate mutations fitting compound heterozygous model. SKDP 6.1 is the father, SKDP the mother, and SKDP 6.3 and 6.4 the affected children.

| Mutation (HGVS nomenclature)           | Gene           | SIFT prediction | SKDP 6.1 | SKDP 6.2 | SKDP 6.3 | SKDP 6.4 |
|----------------------------------------|----------------|-----------------|----------|----------|----------|----------|
| NM_001009944.2:c.3502C>T, p.Pro1168Ser | <i>PKD1</i>    | Tolerated       | X        | ND       | X        | X        |
| NM_001009944.2:c.5611G>A, p.Ala1181Thr | <i>PKD1</i>    | Tolerated       | ND       | X        | X        | X        |
| NM_182924.3:c.2660A>C, p.Lys675Thr     | <i>MICALL2</i> | Tolerated       | X        | ND       | X        | X        |
| NM_182924.3:c.1885G>T, p.Ala604Ser     | <i>MICALL2</i> | Tolerated       | ND       | X        | X        | X        |
| NM_000093.3:c.3562A>G, p.Ile1188Val    | <i>COL5A1</i>  | Tolerated       | X        | ND       | X        | X        |
| NM_000093.3:c.574G>A, p.Asp192Asn      | <i>COL5A1</i>  | Tolerated       | ND       | X        | X        | X        |
